# Supplementary material for: A Piezoelectric MEMS Speaker with a Combined Function of a Silent Alarm
Source: MDPI journal article supplement (doi:10.3390/mi14030702), 2023-03-22
Supplement: s1 [file s1]

# **Piezoelectric MEMS Speaker Combining Function of Silent Alarm**

*Qi Wang<sup>1,2</sup>, Tao Ruan<sup>1,2</sup>, Qingda Xu<sup>1,2</sup>, Zhiyong Hu<sup>1,2</sup>, Bin Yang<sup>1</sup>, Minmin You<sup>1</sup>, Zude Lin<sup>1\*</sup>, and Jingquan Liu<sup>1\*</sup>*

<sup>1</sup>National Key Laboratory of Science and Technology on Micro/Nano Fabrication, Shanghai Jiao Tong University, Shanghai, 200240, China

<sup>2</sup>Collaborative Innovation Center of IFSA, Department of Micro/Nano-electronics, Shanghai Jiao Tong University, Shanghai, 200240, China

\* Corresponding author.

E-mail address: linzude@sjtu.edu.cn; jqliu@sjtu.edu.cn

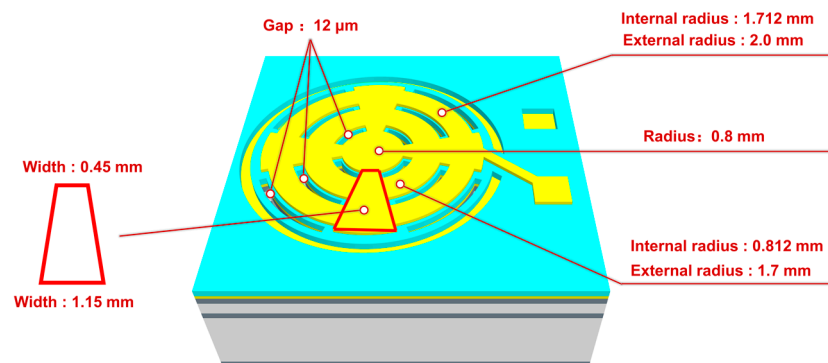

**Figure S1.** Detailed sizes of device.

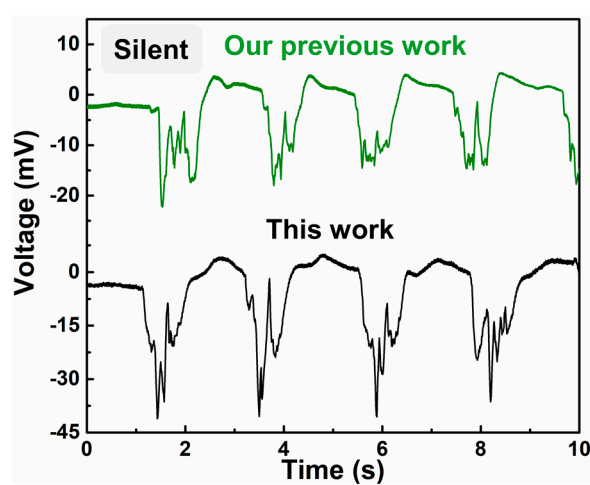

**Figure S2.** Comparison of voltage signals between this work and our previous work.

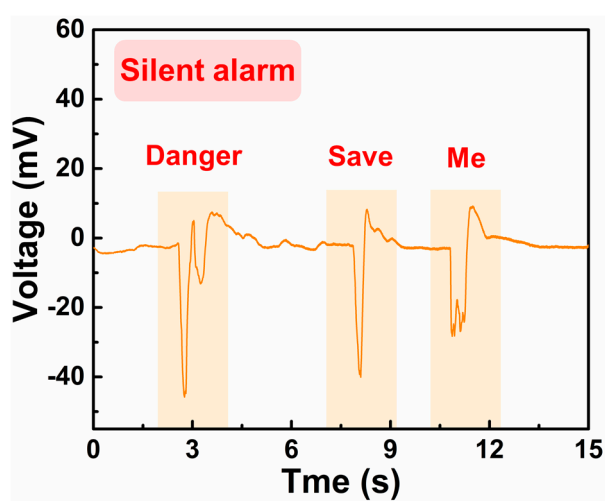

**Figure S3.** Silent alarm in dangerous situations.
